# Supplementary material
Source: ML conference proceedings conference paper supplement (https://openreview.net/forum?id=5GaDcRVgBw)

# Token Length vs Accuracy Heatmap

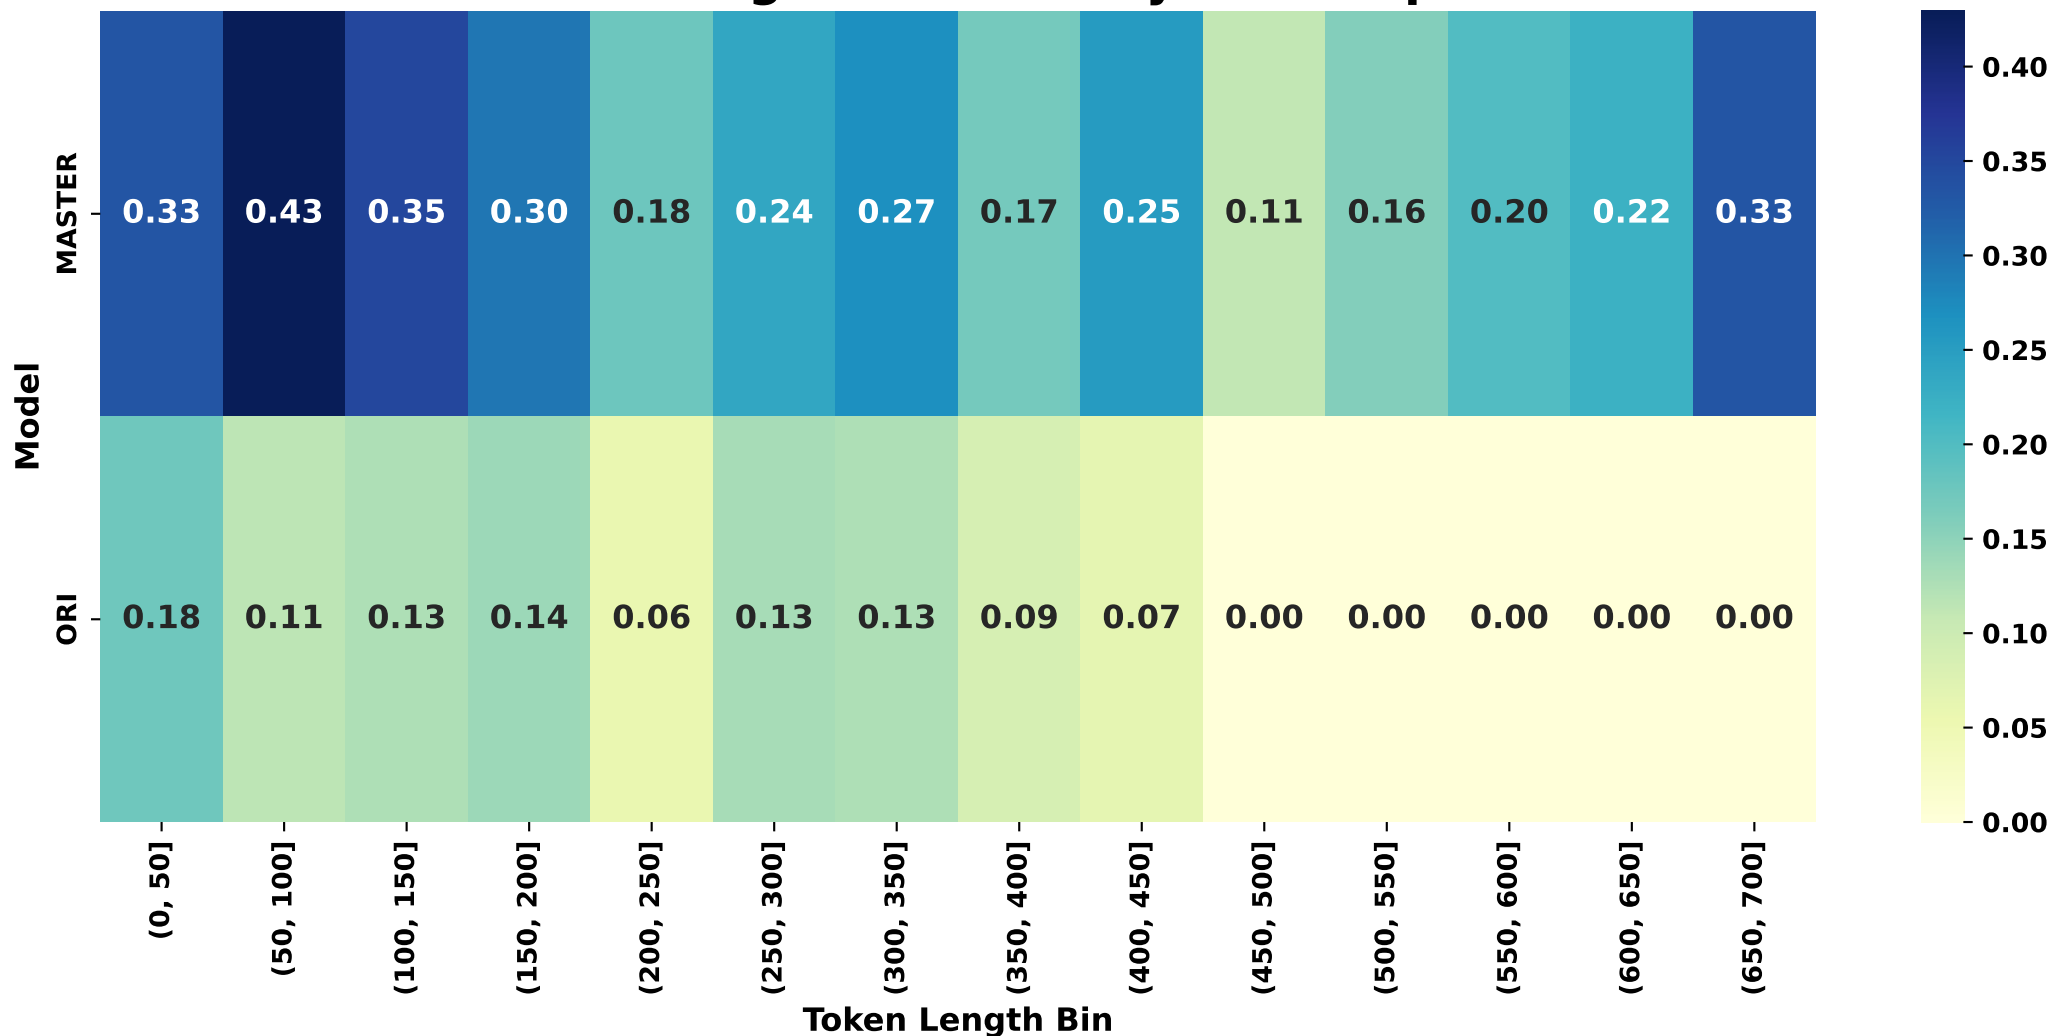

Supplement: supplementary_material [file token_accuracy_heatmap.pdf › Supplementary_Materials/AI_School_main_vllm/Draw/Heatmap/LLaMA/token_accuracy_heatmap.pdf]

# Token Length vs Sample Count Heatmap

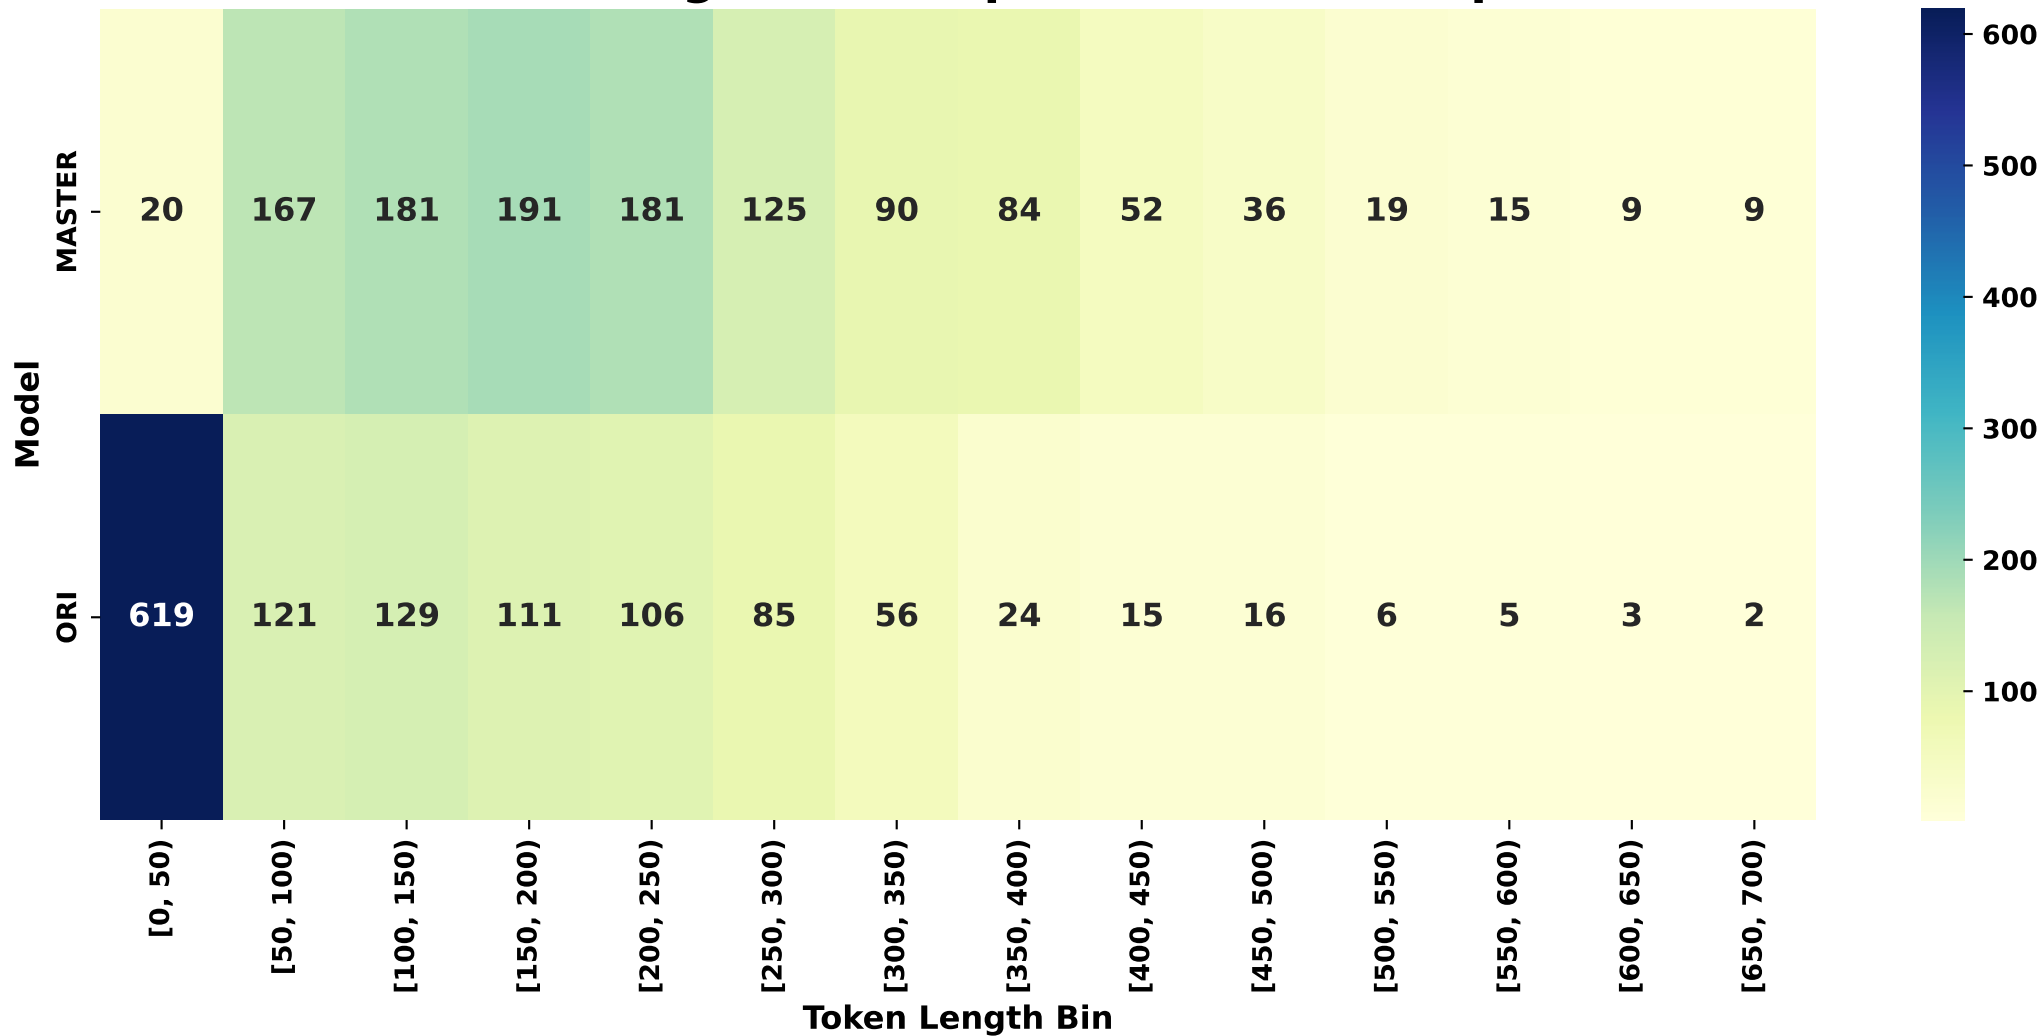

Supplement: supplementary_material [file token_count_heatmap.pdf › Supplementary_Materials/AI_School_main_vllm/Draw/Heatmap/LLaMA/token_count_heatmap.pdf]

# Token Length vs Accuracy Heatmap

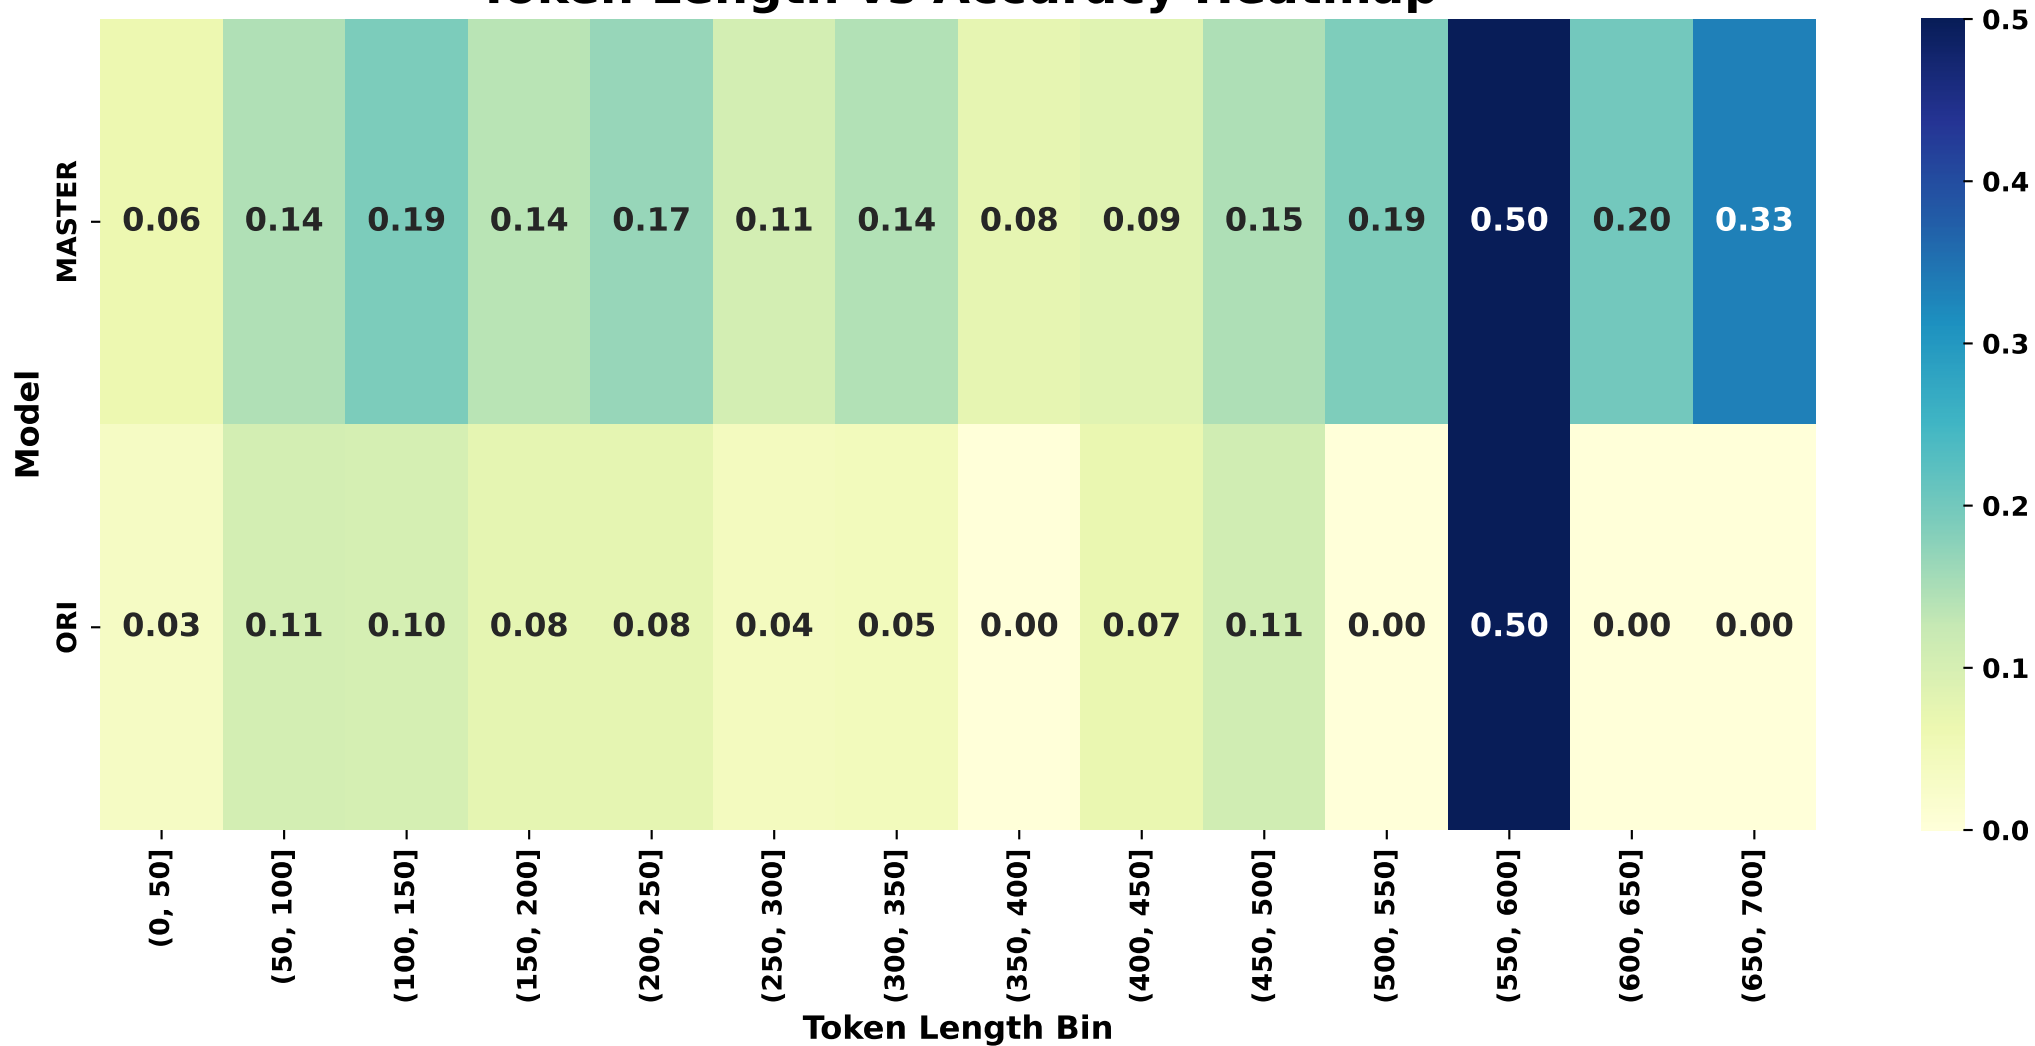

Supplement: supplementary_material [file token_accuracy_heatmap.pdf › Supplementary_Materials/AI_School_main_vllm/Draw/Heatmap/Mistral/token_accuracy_heatmap.pdf]

# Token Length vs Sample Count Heatmap

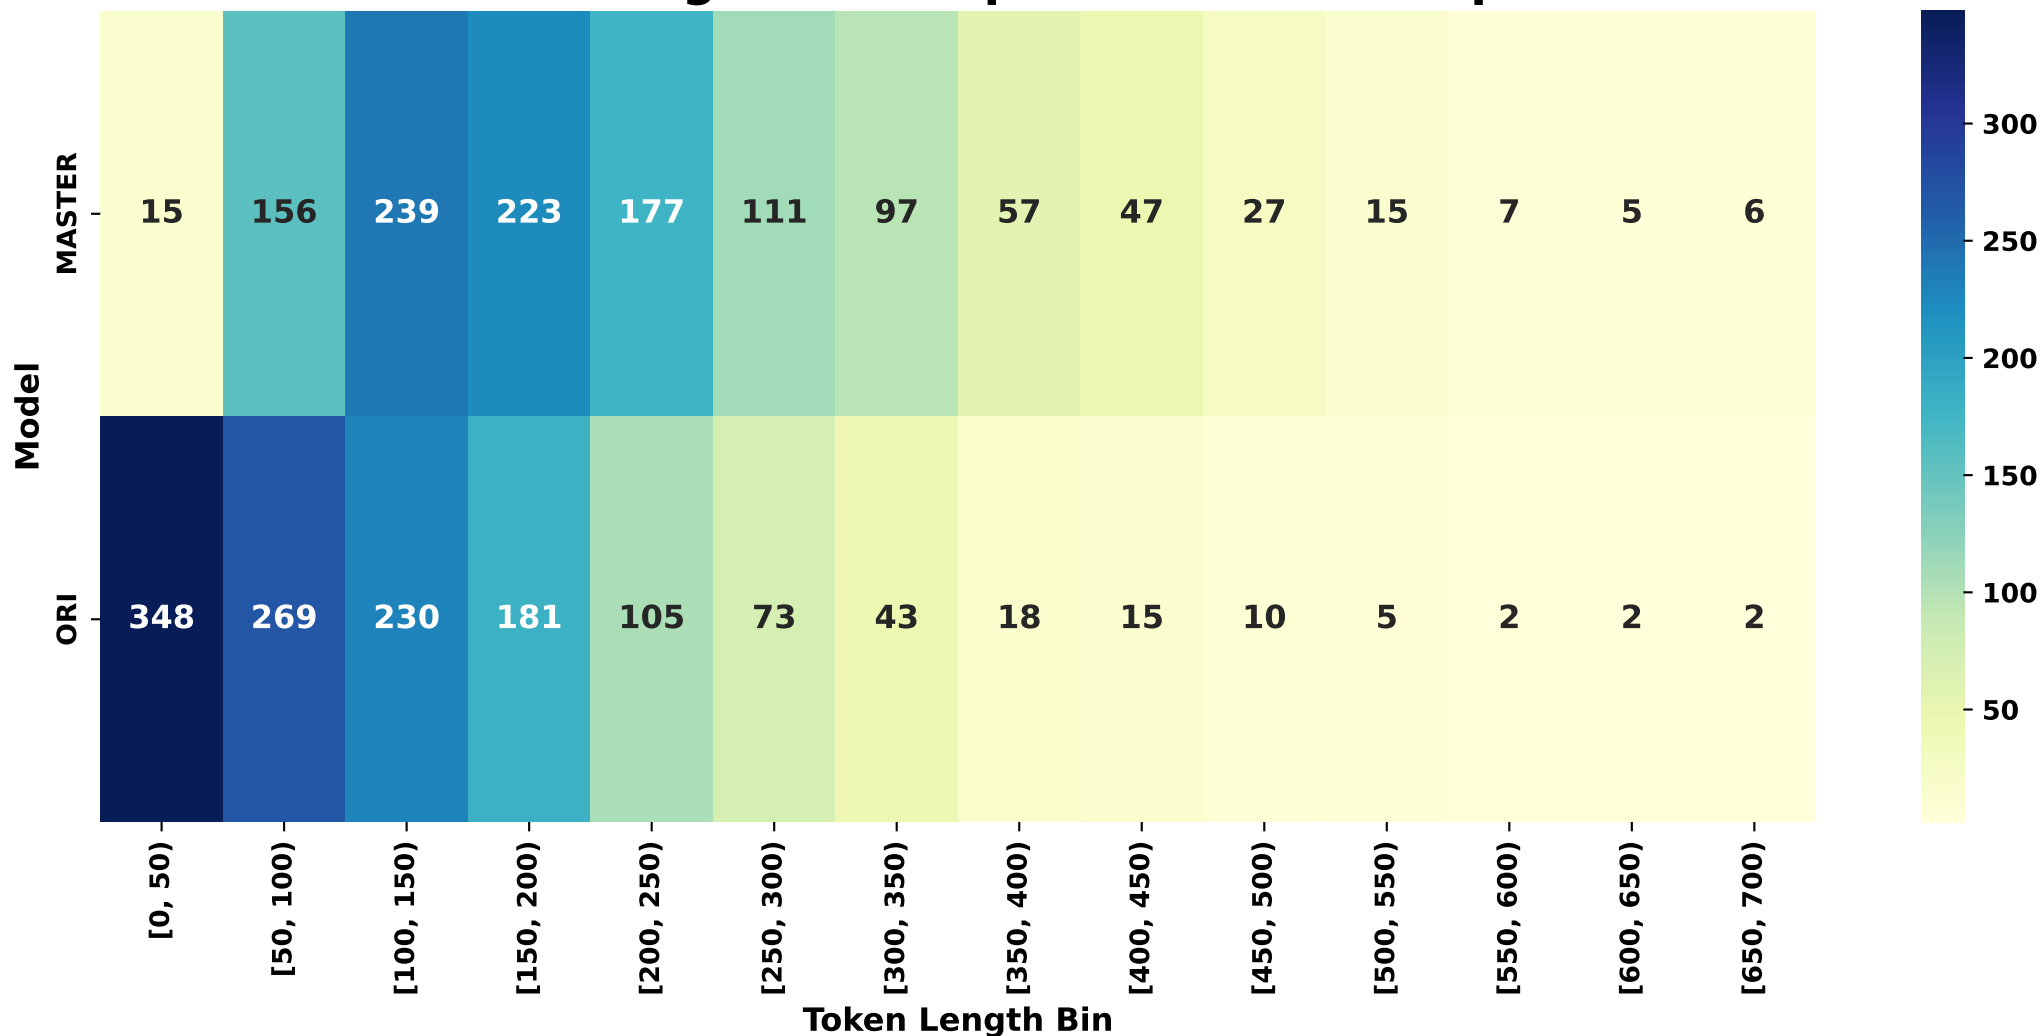

Supplement: supplementary_material [file token_count_heatmap.pdf › Supplementary_Materials/AI_School_main_vllm/Draw/Heatmap/Mistral/token_count_heatmap.pdf]

**Token Count Distribution: MASTER vs ORI (Tokens capped at 1200)**

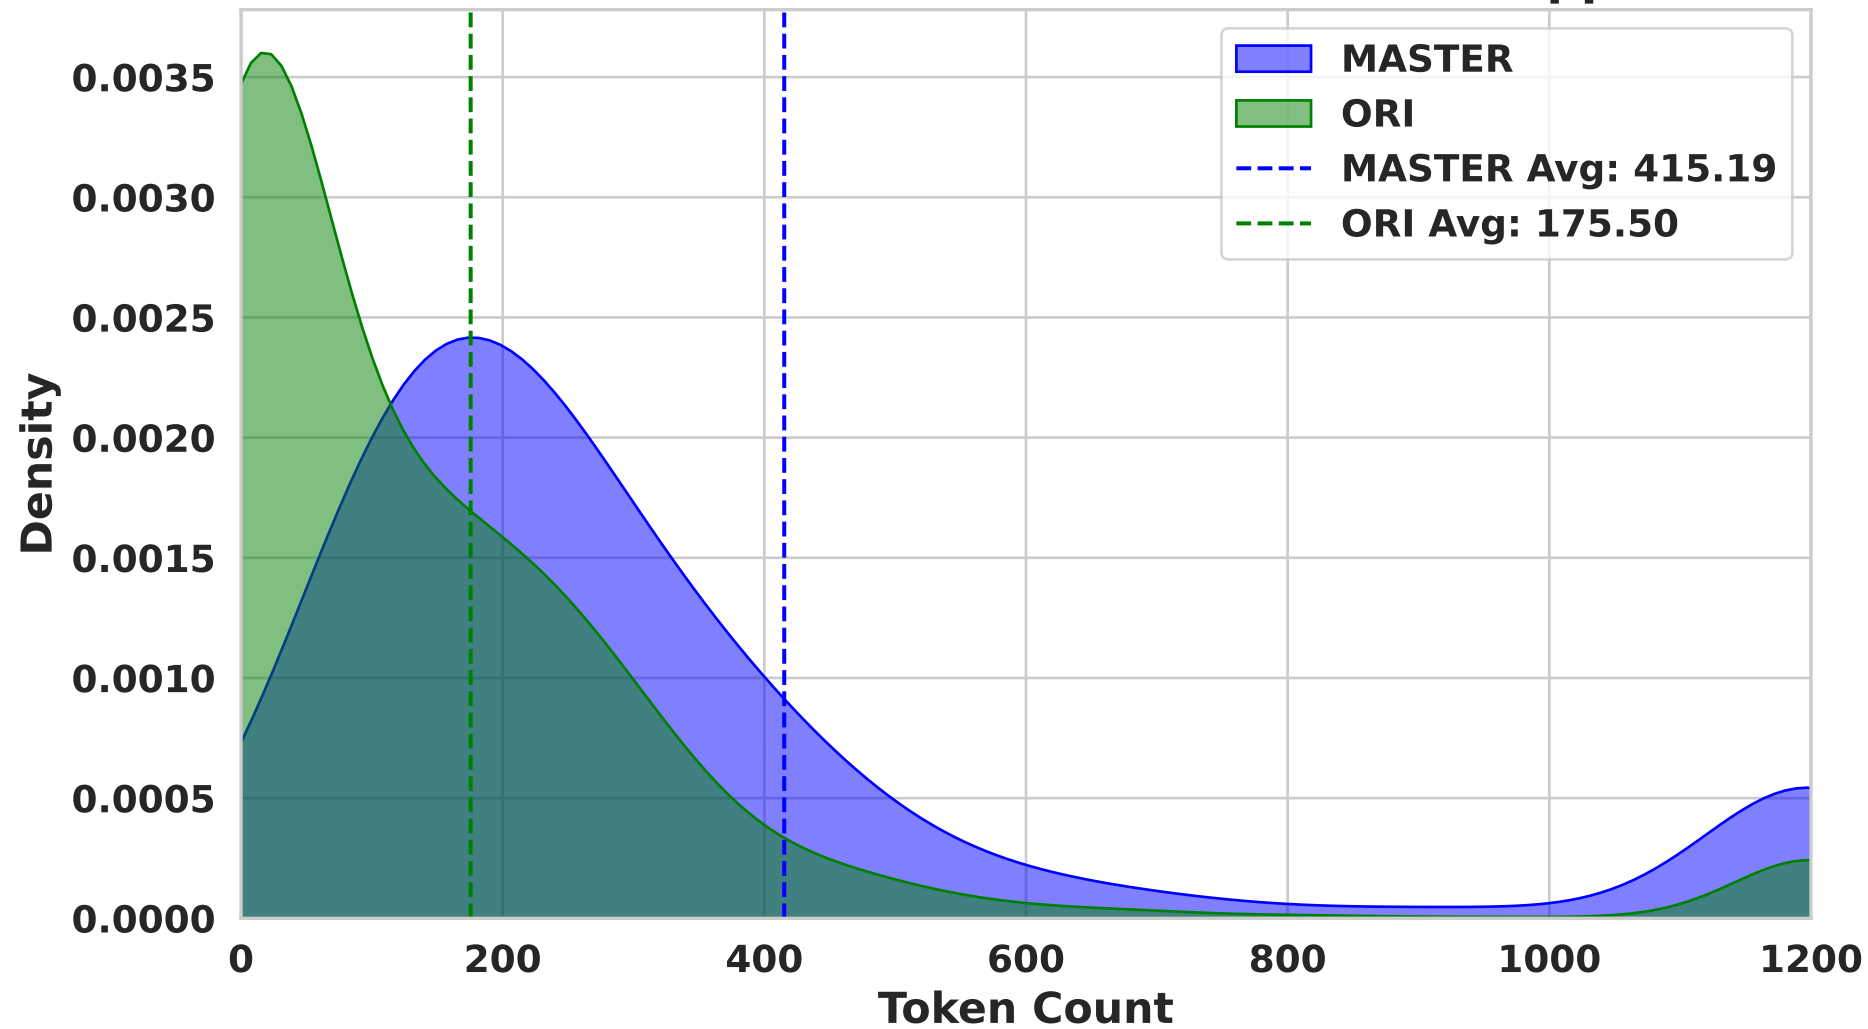

Supplement: supplementary_material [file token_density_plot_capped.pdf › Supplementary_Materials/AI_School_main_vllm/Draw/token_length/LLaMA/token_density_plot_capped.pdf]

**Token Count Distribution: MASTER vs ORI (Tokens capped at 1200)**

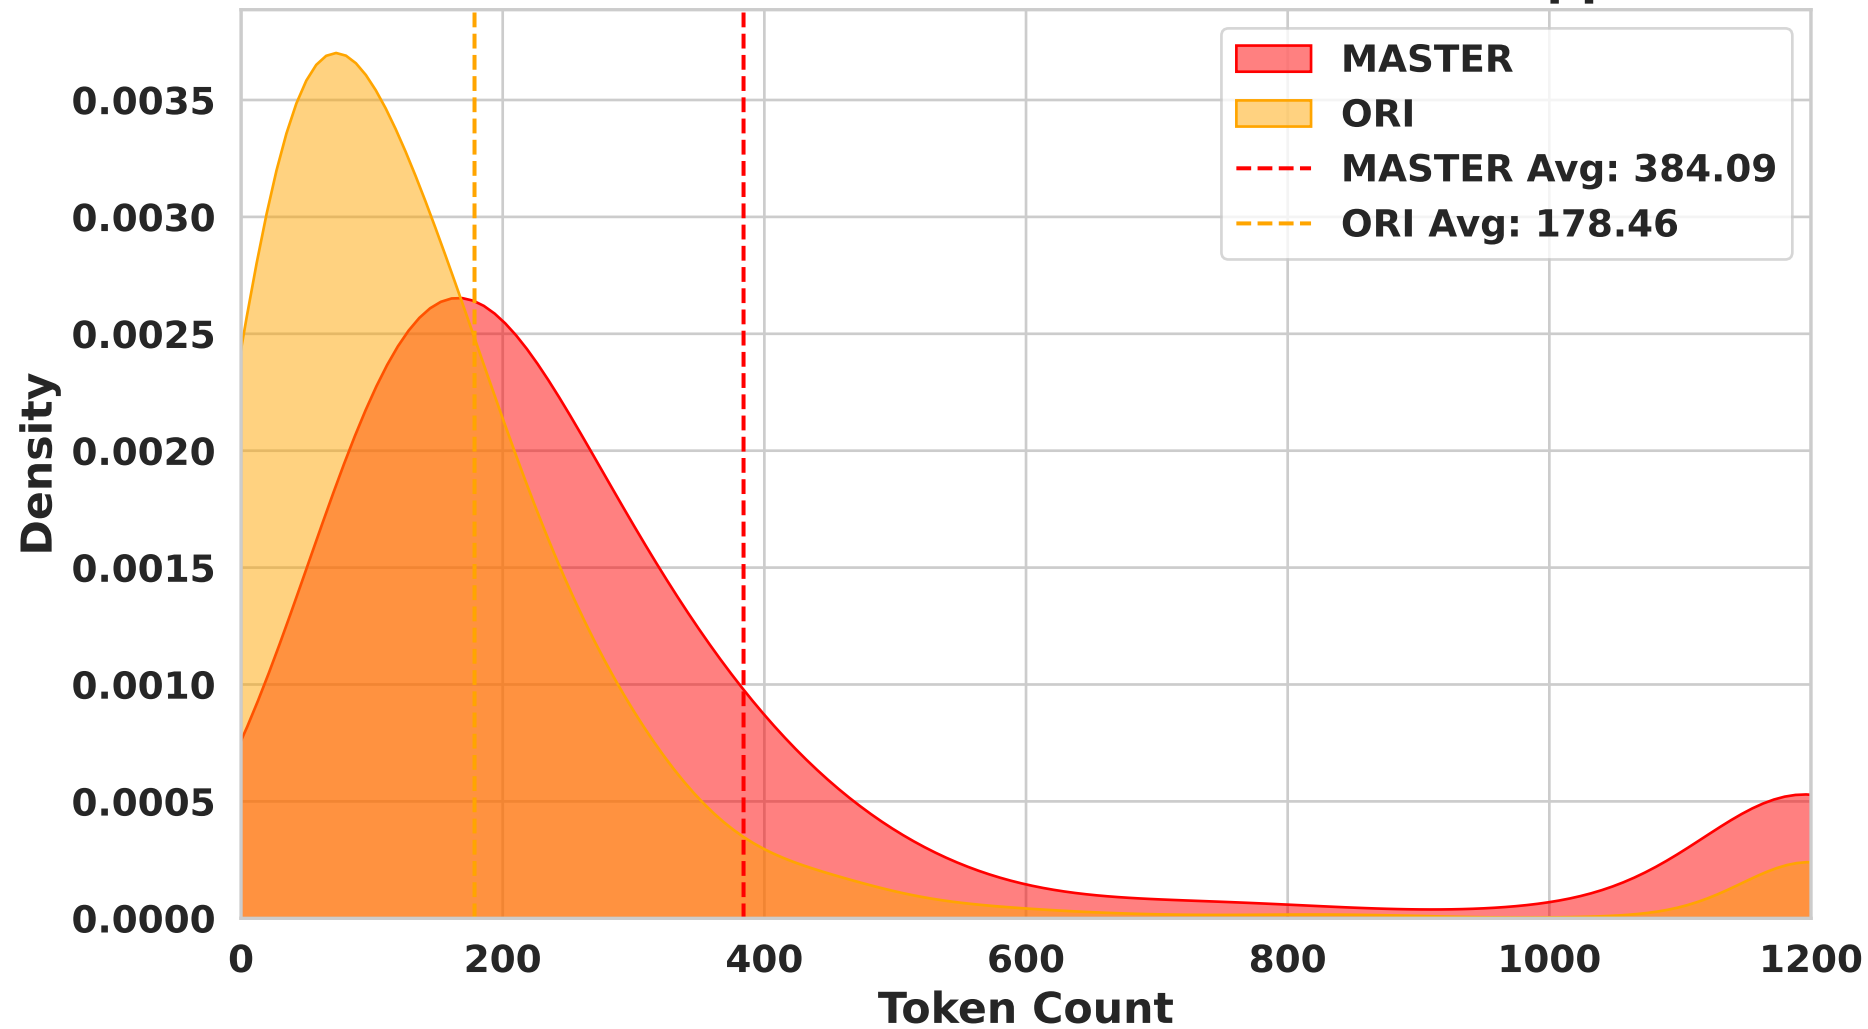

Supplement: supplementary_material [file token_density_plot_capped.pdf › Supplementary_Materials/AI_School_main_vllm/Draw/token_length/Mistral/token_density_plot_capped.pdf]
